# Supplementary material for: It’s Not Easy Being Blue: Are There Olfactory and Visual Trade-Offs in Plant Signalling?
Source: PubMed Central journal article supplement (PMC4482676; doi:10.1371/journal.pone.0131725), 2015-06-26

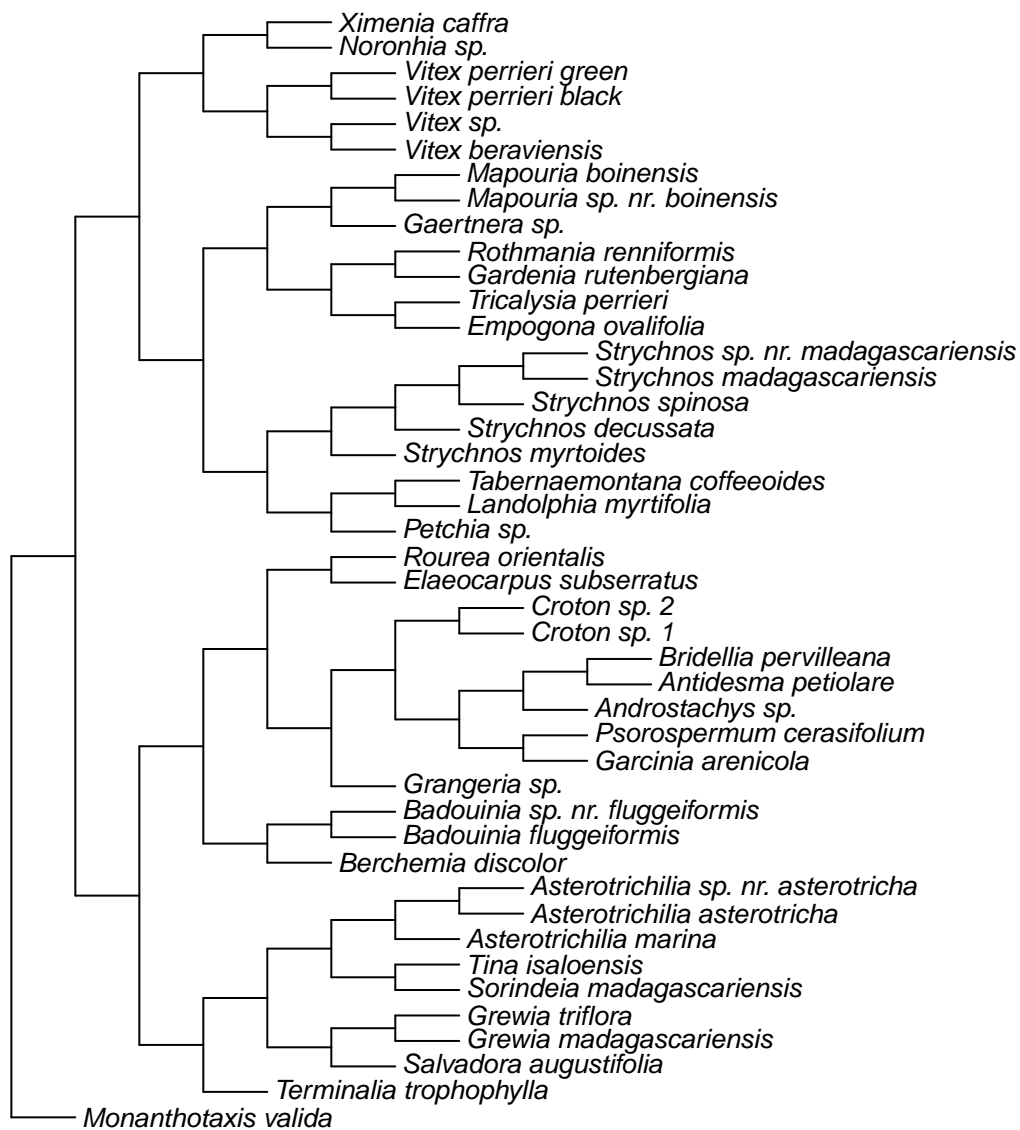

Supplement: pone.0131725.s001.pdf [file pone.0131725.s001.pdf]
